# Supplementary material for: Distinctive electronic structure, unusual magnetic properties and large enhancement in SERS of 1D gallium nanoribbons achieved by doping calix[6]arene
Source: Royal Society of Chemistry journal article supplement (doi:10.1039/c2jm00082b), 2012-01-01
Supplement: c2jm00082b.pdf [file c2jm00082b.pdf]

## Supporting Information

### Electronic Structure, Unusual Magnetic Property and Large Enhancement in SERS of 1D Gallium Nanoribbons Achieved by Doping Calix[6]arene

Jie Chen<sup>a</sup>, Le Xin Song<sup>\*,a,b</sup>, Jing Yang<sup>a</sup>, Juan Xia<sup>a</sup> and Zhi Cheng Shao<sup>a</sup>

<sup>(a)</sup> Department of Chemistry, University of Science and Technology of China, Hefei 230026, China)

<sup>(b)</sup> State Key Laboratory of Coordination Chemistry, Nanjing University, Nanjing 210093, China)

[solexin@ustc.edu.cn](mailto:solexin@ustc.edu.cn)

#### A list of the contents for all the Supporting Information

| Pages | Contents                                                                                                                                                               |
|-------|------------------------------------------------------------------------------------------------------------------------------------------------------------------------|
| 1     | A table of contents page.                                                                                                                                              |
| 2     | <sup>1</sup> H NMR spectra of CA-6 (a) and Ga-a (b) in DMSO at 300 K.                                                                                                  |
| 3     | FE-SEM images of Ga-a <sub>1</sub> (a), Ga-a <sub>2</sub> (b), Ga-a <sub>3</sub> (c), Ga-a <sub>4</sub> (d), Ga-a <sub>5</sub> (e) and Ga-a <sub>6</sub> (f).          |
| 4     | FE-SEM images of CA-6 (a), Ga-a (b), Ga-b (c), Ga-c (d) and Ga-d (e).                                                                                                  |
| 5     | XRD patterns of Ga-b (a), Ga-c (b) and Ga-d (c).                                                                                                                       |
| 6     | FTIR spectra of CA-6 (a), Ga-a <sub>1</sub> (b), Ga-a <sub>2</sub> (c), Ga-a <sub>3</sub> (d), Ga-a <sub>4</sub> (e), Ga-a <sub>5</sub> (f) and Ga-a <sub>6</sub> (g). |
| 7     | Binding energies (eV) of core levels of Ga-0, Ga-a, Ga-b series and Ga-a <sub>1</sub> series materials.                                                                |
| 8     | Continuous DSC heating curves of Ga-b (a), Ga-c (b) and Ga-d (c) in the second cycle.                                                                                  |
| 9     | Field dependence of <i>M</i> of (A) Ga-a <sub>1</sub> to a <sub>6</sub> and (B) Ga-b to d at 4.5 K.                                                                    |

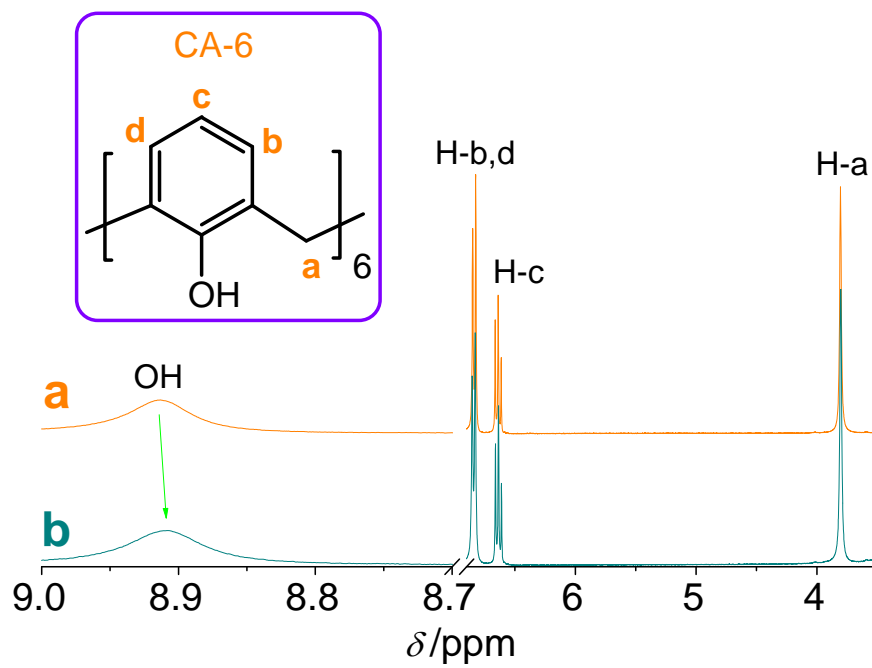

**Fig. S1** <sup>1</sup>H NMR spectra of CA-6 (a) and Ga-a (b) in DMSO at 300 K.

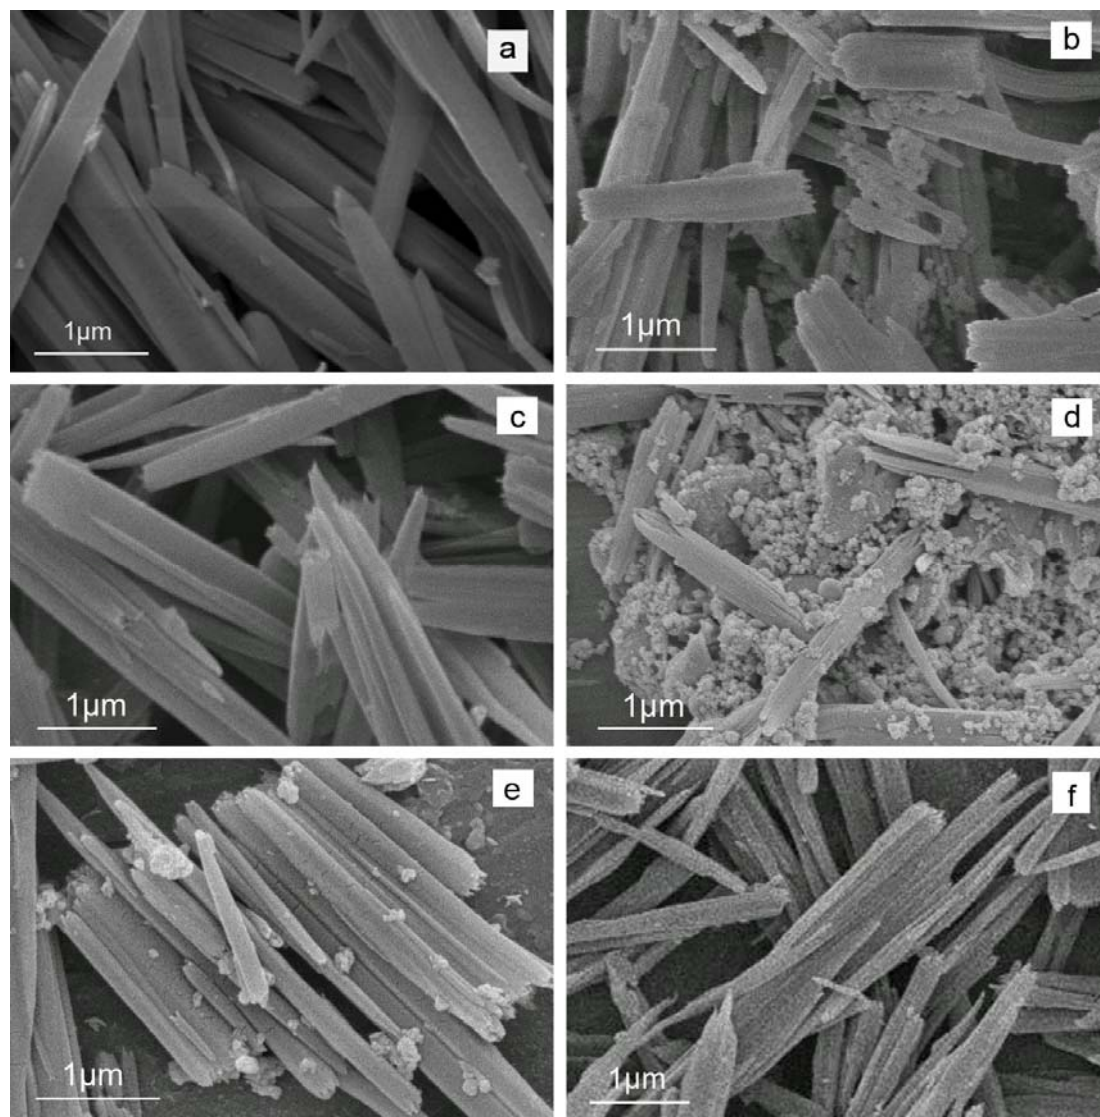

**Fig. S2** FE-SEM images of Ga-a<sub>1</sub> (a), Ga-a<sub>2</sub> (b), Ga-a<sub>3</sub> (c), Ga-a<sub>4</sub> (d), Ga-a<sub>5</sub> (e) and Ga-a<sub>6</sub> (f).

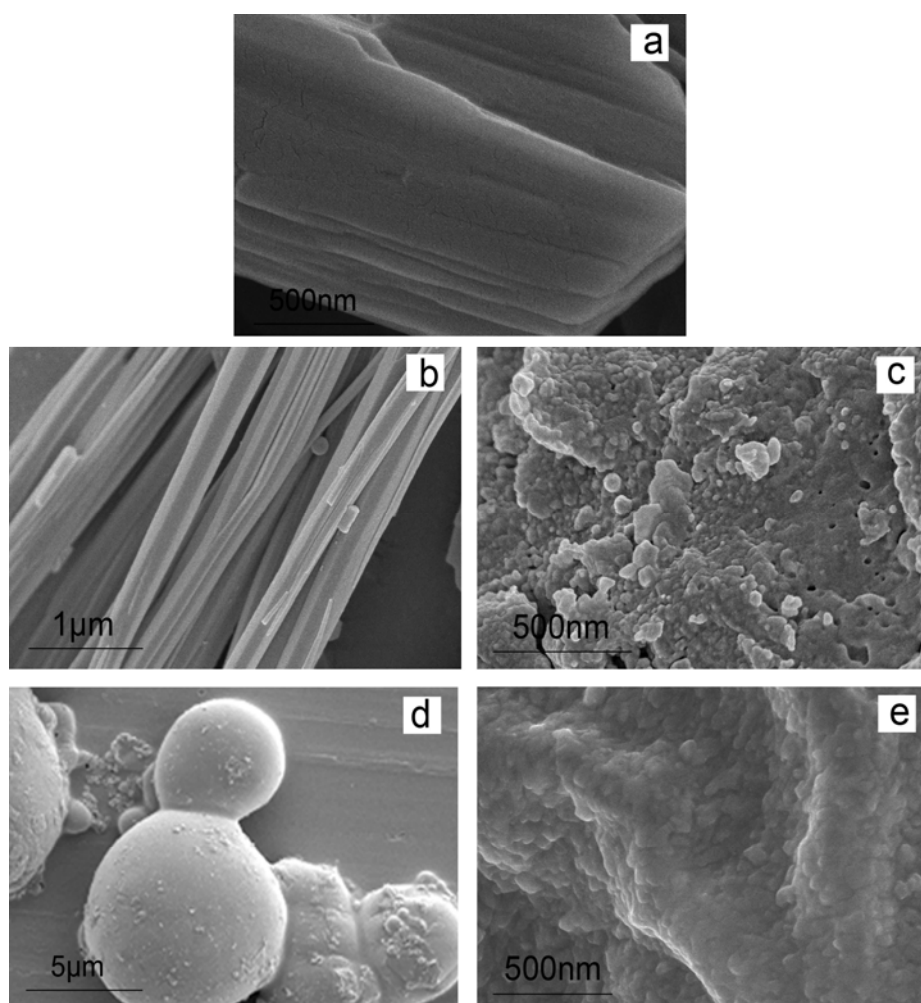

**Fig. S3** FE-SEM images of CA-6 (a), Ga-a (b), Ga-b (c), Ga-c (d) and Ga-d (e).

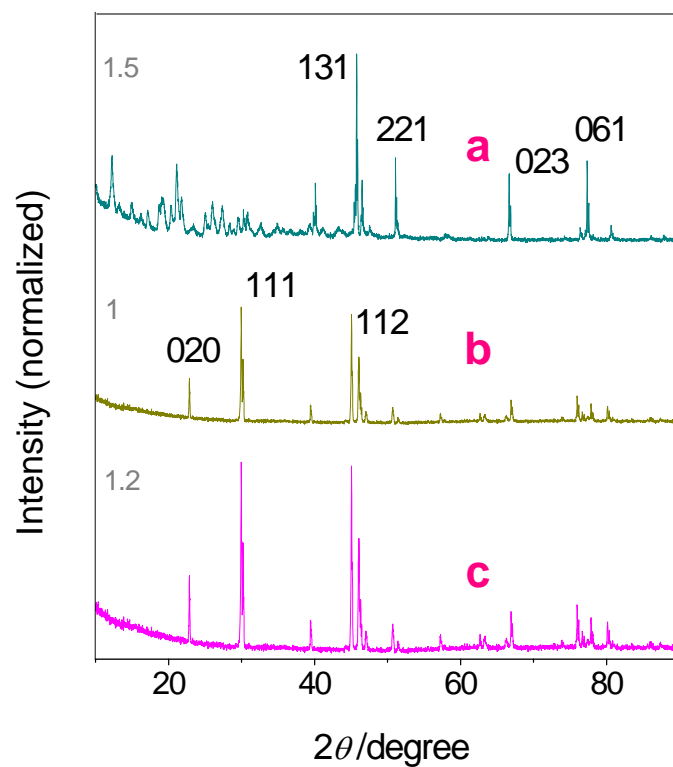

**Fig. S4** XRD patterns of Ga-**b** (a), Ga-**c** (b) and Ga-**d** (c). Relative signal intensity was normalized to the intensity of the peak at 30.2° in Curve b. Note that the peaks below 30.0° represent the diffraction peaks of hosts, except the plane (020) at 23.2° of Ga.

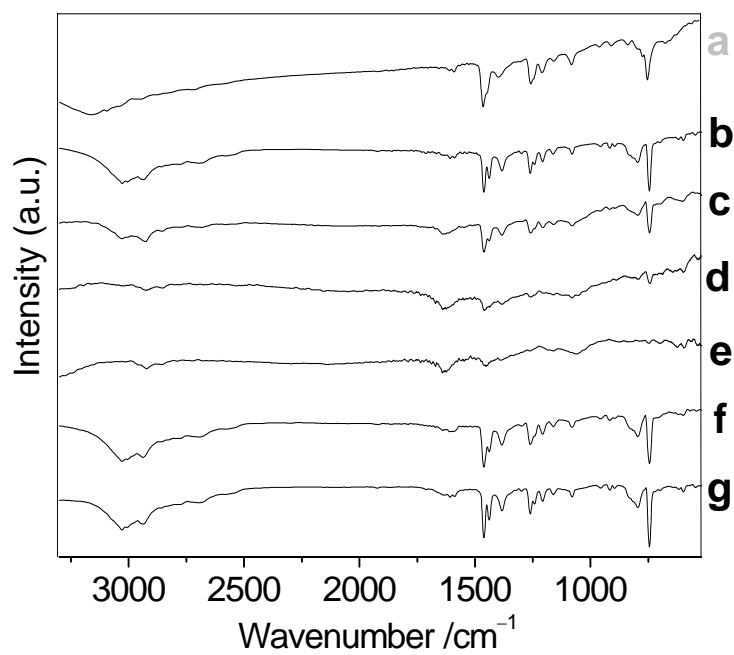

**Fig. S5** FTIR spectra of CA-6 (a), Ga-a<sub>1</sub> (b), Ga-a<sub>2</sub> (c), Ga-a<sub>3</sub> (d), Ga-a<sub>4</sub> (e), Ga-a<sub>5</sub> (f) and Ga-a<sub>6</sub> (g).

**TABLE S1:** Binding energies (eV) of core levels of Ga-**0**, Ga-**a** and Ga-**b** series materials

| Samples      | Binding energy (eV) |                      |                      |
|--------------|---------------------|----------------------|----------------------|
|              | Ga 3d               | Ga 2p <sub>3/2</sub> | Ga 2p <sub>1/2</sub> |
| Ga- <b>0</b> | 18.7                | 1116.7               | 1143.5               |
| Ga- <b>a</b> | 20.2                | 1121.1               | 1148.2               |
| Ga- <b>b</b> | 19.2                | 1120.6               | 1147.8               |
| Ga- <b>c</b> | 18.6                | 1118.5               | 1145.5               |
| Ga- <b>d</b> | 17.6                | 1118.6               | 1145.0               |

**TABLE S2:** Binding energies (eV) of core levels of Ga-**a**<sub>1</sub> series materials

| Samples                   | Binding energy (eV) |                      |                      |
|---------------------------|---------------------|----------------------|----------------------|
|                           | Ga 3d               | Ga 2p <sub>3/2</sub> | Ga 2p <sub>1/2</sub> |
| Ga- <b>a</b> <sub>1</sub> | 19.9                | 1119.9               | 1147.2               |
| Ga- <b>a</b> <sub>2</sub> | 19.4                | 1119.8               | 1146.8               |
| Ga- <b>a</b> <sub>3</sub> | 19.0                | 1119.6               | 1146.6               |
| Ga- <b>a</b> <sub>4</sub> | 18.3                | 1118.2               | 1145.2               |
| Ga- <b>a</b> <sub>5</sub> | 19.0                | 1119.7               | 1147.1               |
| Ga- <b>a</b> <sub>6</sub> | 19.3                | 1119.4               | 1144.1               |

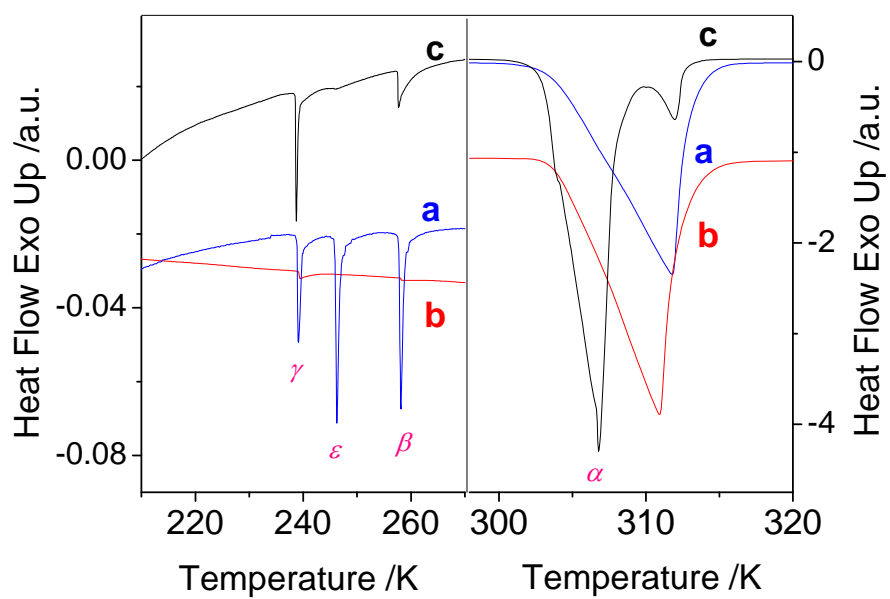

**Fig. S6** Continuous DSC heating curves of Ga-**b** (a), Ga-**c** (b) and Ga-**d** (c) in the second cycle.



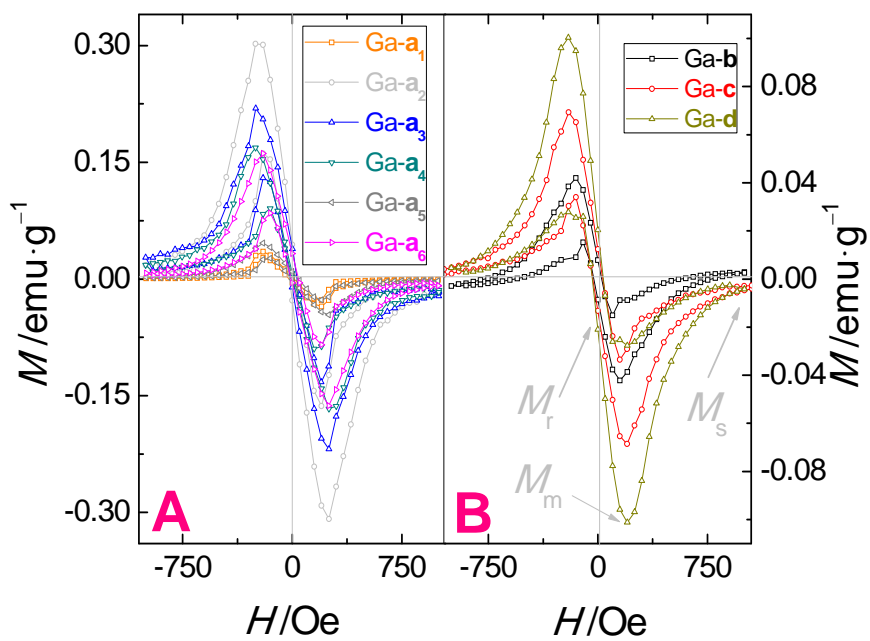

**Fig. S7** Field dependence of  $M$  of (A) Ga-a<sub>1</sub> to a<sub>6</sub> and (B) Ga-b to d at 4.5 K.
